# Supplementary material for: External quality assurance schemes (EQUASs) and interlaboratory comparison investigations (ICIs) for the human biomonitoring of aromatic amines in urine as part of the quality assurance programme under HBM4EU
Source: Royal Society of Chemistry journal article supplement (doi:10.1039/d4ay01309c), 2024-11-12
Supplement: d4ay01309c1.pdf [file d4ay01309c1.pdf]

Supplementary material to External quality assurance schemes (EQUASs) and interlaboratory comparison investigations (ICIs) for the human biomonitoring of aromatic amines in urine as part of the quality assurance programme under HBM4EU

## Supplementary material to

### External quality assurance schemes (EQUASs) and interlaboratory comparison investigations (ICIs) for the human biomonitoring of aromatic amines in urine as part of the quality assurance programme under HBM4EU

## Table of contents

---

|                                                                                          |   |
|------------------------------------------------------------------------------------------|---|
| Analytical procedure for testing the control materials used in the QA/QC programme ..... | 3 |
|------------------------------------------------------------------------------------------|---|

### List of tables

|                                                                                                                        |    |
|------------------------------------------------------------------------------------------------------------------------|----|
| Suppl. Table 1 Countries and numbers of participants .....                                                             | 2  |
| Suppl. Table 2 Final concentrations of the control materials (CMs) .....                                               | 2  |
| Suppl. Table 3 Method information for measuring the homogeneity and stability of aniline and TOL .....                 | 4  |
| Suppl. Table 4 Method information for measuring the homogeneity and stability of 2,4-TDA, 2,6-TDA, MDA, and MOCA ..... | 4  |
| Suppl. Table 5 Obtained values of homogeneity measurements (n = 10) .....                                              | 5  |
| Suppl. Table 6 Obtained values of stability measurements (n = 3) .....                                                 | 6  |
| Suppl. Table 7 Overview of evaluation scheme, evaluation results and Z-scores .....                                    | 7  |
| Suppl. Table 8 Range of LOQs reported by participants and experts for aromatic amines .....                            | 11 |

### List of figures

|                                                                                                                                      |    |
|--------------------------------------------------------------------------------------------------------------------------------------|----|
| Suppl. Fig. 1 Structures of the analysed aromatic amines in the HBM4EU QA/QC programme .....                                         | 13 |
| Suppl. Fig. 2 Number of biomarkers for which quantitative results were reported .....                                                | 13 |
| Suppl. Fig. 3 Average of satisfactory results for the evaluable biomarkers in CM <sub>low</sub> (a) and CM <sub>high</sub> (b) ..... | 14 |
| Suppl. Fig. 4 Method features of experts (n = 5) and participants (n = 5) cal = calibration, ISTD = internal standard .....          | 15 |
| Suppl. Fig. 5 Applied instruments and detection techniques by participants (including experts) .....                                 | 15 |

Supplementary material to External quality assurance schemes (EQUASs) and interlaboratory comparison investigations (ICIs) for the human biomonitoring of aromatic amines in urine as part of the quality assurance programme under HBM4EU

**Suppl. Table 1 Countries and numbers of participants**

| Country     | Number of participants |
|-------------|------------------------|
| Germany     | 7                      |
| UK          | 1                      |
| France      | 2                      |
| Switzerland | 1 <sup>#</sup>         |

<sup>#</sup>only registered

**Suppl. Table 2 Final concentrations of the control materials (CMs)**

| Aromatic amine <sub>CM</sub>  | Final concentration (ng/mL) |                  |         |
|-------------------------------|-----------------------------|------------------|---------|
|                               | Round 1                     | Round 2          | Round 3 |
| <b>TOL<sub>low</sub></b>      | 0.3                         | 0.3              | 0.5     |
| <b>TOL<sub>high</sub></b>     | 1.5                         | 1.5              | 2       |
| <b>Aniline<sub>low</sub></b>  | 2.7 <sup>#</sup>            | 1.5 <sup>#</sup> | 4.4     |
| <b>Aniline<sub>high</sub></b> | 10                          | 10               | 20      |
| <b>MOCA<sub>low</sub></b>     | 10                          | 13               | 13      |
| <b>MOCA<sub>high</sub></b>    | 100                         | 120              | 50      |
| <b>2,4-TDA<sub>low</sub></b>  | 50                          | 52               | 48      |
| <b>2,4-TDA<sub>high</sub></b> | 180                         | 180              | 80      |
| <b>2,6-TDA<sub>low</sub></b>  | 50                          | 48               | 52      |
| <b>2,6-TDA<sub>high</sub></b> | 200                         | 220              | 80      |
| <b>MDA<sub>low</sub></b>      | 5                           | 5.5              | 2.5     |
| <b>MDA<sub>high</sub></b>     | 90                          | 95               | 10      |

<sup>#</sup>No additional spiking was conducted as the native concentrations in the pooled urine were sufficiently high to reach the range of the expected exposure levels in the general population.

## Analytical procedure for testing the control materials used in the QA/QC programme

---

### Determination of aniline and TOL

First, 5 mL of urine was spiked with 30  $\mu\text{L}$  of the internal standard solution (75.5  $\mu\text{g/L}$  TOL-D<sub>9</sub> and 742  $\mu\text{g/L}$  aniline-<sup>13</sup>C<sub>6</sub> in ACN) and 1 mL HCl (37%). The sample was hydrolysed for 1 h at 80–85 °C and subsequently cooled in an ice bath, followed by the addition of 750  $\mu\text{L}$  10M NaOH, 3 mL 0.5M MES buffer (pH 6), and another 500  $\mu\text{L}$  10M NaOH. The pH was adjusted to  $6.2 \pm 0.2$  by adding either 10M NaOH or acetic acid. The sample was then extracted twice on the multi-tube mixer, using 5 mL *n*-hexane for 15 min each time. Phase separation was achieved by centrifugation (10 min, 2200 *g*, approx. 10 °C). The hexane phase was transferred into a fresh tube through an intermediate Na<sub>2</sub>SO<sub>4</sub> filter. The filter was rinsed with 2 mL *n*-hexane. Subsequently, 25  $\mu\text{L}$  pyridine and 50  $\mu\text{L}$  pentafluoropropionic anhydride (PFPA) were added to the combined organic phase for derivatisation, which was carried out in a water bath for 1 h at 80–85 °C. The sample was cooled to room temperature followed by the extraction with 3 mL phosphate buffer (pH 8). The sample was then centrifuged for phase separation (5 min, approx. 2000 *g*, approx. 10 °C). After that, 200  $\mu\text{L}$  toluene were added to the organic phase, which was then concentrated in a vacuum concentrator to approx. 50–80  $\mu\text{L}$ . The sample was transferred into a vial and analysed by GC-MS (negative chemical ionization). Sample analysis was performed with an Rxi-5MS (30 m, 0.25 mm ID, 0.25  $\mu\text{m}$  df) at an injector temperature of 280 °C, a constant helium flow of 1.1 mL/min, and the following temperature program: initial temperature of 100 °C was held for 1 min. The temperature was then increased to 117 °C at a rate of 3 °C/min, to 200 °C at a rate of 8 °C/min, and further to 300 °C at a rate of 25 °C/min. The source temperature was set to 180 °C, interface temperature was 280 °C, and the solvent delay was 4.5 min. The limits of quantification (LOQ) and detection (LOD) for aniline were 0.200 ng/mL and 0.0667 ng/mL, for TOL 0.0100 ng/mL and 0.00333 ng/mL.

### Determination of 2,4-TDA, 2,6-TDA, MDA, and MOCA

100  $\mu\text{L}$  6 N HCl and 50  $\mu\text{L}$  of the internal standard solution (1  $\mu\text{g/mL}$  2,4-TDA-<sup>13</sup>C<sub>6</sub>, 1  $\mu\text{g/mL}$  2,6-TDA-<sup>13</sup>C<sub>6</sub>, and 0.2  $\mu\text{g/mL}$  4,4'-MDA-D<sub>8</sub> in H<sub>2</sub>O) were added to a 250  $\mu\text{L}$  urine sample, mixed properly and hydrolysed for 4 h at 80 °C. The sample was cooled down, and 500  $\mu\text{L}$  1 N NaOH were added before solid phase extraction (SPE). SPE cartridges (Strata XC, 30 mg, 3 mL, Phenomenex Ltd. Deutschland, Aschaffenburg, Germany) were conditioned with 1 mL MeOH and 1 mL water. Afterward loading the sample, the cartridge was washed with 1 mL 0.1 N HCl and 2 mL MeOH. The sample was eluted with 2  $\times$  500  $\mu\text{L}$  MeOH/isopropanol/NH<sub>4</sub>OH (63:17:20), evaporated to dryness using a vacuum concentrator, reconstituted in 250  $\mu\text{L}$  NH<sub>4</sub>OAc/ACN (9:1, pH 9.2), and finally analysed by LC-MS/MS. A Gemini C18 column (3  $\mu\text{m}$ , 3  $\times$  150 mm, 110 Å, Phenomenex Ltd. Deutschland, Aschaffenburg, Germany) was used for chromatographic separation with a flow rate of 1 mL/min and the following gradient applied: Starting conditions were 10% B; this proportion increased over 30% B over the course of 1 min. Over the next minute, the gradient further increased to 90% B, which was held constant for the next 2 min. The B-content decreased over the course of 1 min to the starting condition of 10 %, under which the column was re-equilibrated for the next 3 min. Injection volume was 5  $\mu\text{L}$  and column oven was kept at 35 °C. The MS was operated in positive-ion mode with the following parameters applied: Collision Gas (CAD) 5, Source Gas 1 (GS1) 45, Source Gas 2 (GS2) 55, Curtain Gas (CUR) 30, Ion Source (IS) 5500, Temperature (TEM) 650, Entrance Potential (EP) 10. The LOQ (and LOD) were as follows: 2,4-TDA 25.0 ng/mL (8.33 ng/mL), 2,6-TDA 25.0 ng/mL (8.33 ng/mL), MDA 0.100 ng/mL (0.0333 ng/mL), MOCA 10 ng/mL (3.33 ng/mL).

**Suppl. Table 3 Method information for measuring the homogeneity and stability of aniline and TOL**

|                                |                                 |                                                                     |
|--------------------------------|---------------------------------|---------------------------------------------------------------------|
| <b>ISO17025 accredited</b>     |                                 | Yes                                                                 |
| <b>Sample preparation</b>      | Sample amount extracted         | 5 mL                                                                |
| <b>Extraction</b>              | pH adjustment                   | 6–6.4                                                               |
|                                | LLE                             | 2× 5 mL Hexane (15 min)                                             |
| <b>Derivatisation</b>          | Reagent                         | PFPA                                                                |
| <b>Instrument</b>              | Separation                      | GC                                                                  |
|                                | Detection                       | MS single quadrupole                                                |
| <b>Quantification</b>          | Use of internal standard (ISTD) | Yes                                                                 |
|                                | Isotopic label                  | Yes                                                                 |
|                                | Moment of addition              | Before hydrolysis                                                   |
|                                | Response normalised to ISTD     | Yes                                                                 |
| <b>Calibration</b>             | Matrix-matched                  | Addition to blank matrix before extraction                          |
|                                | Multilevel                      | Yes                                                                 |
| <b>Correction for recovery</b> | No                              |                                                                     |
| <b>Identification criteria</b> | Retention-time tolerance        | Identification via retention time of isotopically labelled standard |

**Suppl. Table 4 Method information for measuring the homogeneity and stability of 2,4-TDA, 2,6-TDA, MDA, and MOCA**

|                                |                                 |                                                                     |
|--------------------------------|---------------------------------|---------------------------------------------------------------------|
| <b>ISO17025 accredited</b>     |                                 | No                                                                  |
| <b>Sample preparation</b>      | Sample amount extracted         | 0.25 mL                                                             |
| <b>Extraction</b>              | pH adjustment                   | 1                                                                   |
|                                | SPE                             |                                                                     |
| <b>Derivatisation</b>          | No                              |                                                                     |
| <b>Instrument</b>              | Separation                      | HPLC                                                                |
|                                | Detection                       | MS triple quadrupole                                                |
| <b>Quantification</b>          | Use of internal standard (ISTD) | Yes                                                                 |
|                                | Isotopic label                  | Yes                                                                 |
|                                | Moment of addition              | Before hydrolysis                                                   |
|                                | Response normalised to ISTD     | Yes                                                                 |
| <b>Calibration</b>             | Matrix-matched                  | Addition to blank matrix before extraction                          |
|                                | Multilevel                      | Yes                                                                 |
| <b>Correction for recovery</b> | No                              |                                                                     |
| <b>Identification criteria</b> | Retention-time tolerance        | Identification via retention time of isotopically labelled standard |

**Suppl. Table 5** Obtained values of homogeneity measurements (n = 10)

| Aromatic amine <sub>CM</sub>  | Round 1      |         | Round 2      |         | Round 3      |         | Over all rounds |
|-------------------------------|--------------|---------|--------------|---------|--------------|---------|-----------------|
|                               | Mean (ng/mL) | RSD (%) | Mean (ng/mL) | RSD (%) | Mean (ng/mL) | RSD (%) | Mean RSD (%)    |
| <b>TOL<sub>low</sub></b>      | 0.31         | 3.2     | 0.29         | 3.4     | 0.5          | 4.0     | <b>3.6</b>      |
| <b>TOL<sub>high</sub></b>     | 1.48         | 2.7     | 1.4          | 2.9     | 1.96         | 2.0     | <b>2.5</b>      |
| <b>Aniline<sub>low</sub></b>  | 2.7          | 14.8    | 1.5          | 13.3    | 4.4          | 9.1     | <b>12.4</b>     |
| <b>Aniline<sub>high</sub></b> | 11.8         | 3.4     | 9.7          | 3.1     | 18.8         | 2.1     | <b>2.9</b>      |
| <b>MOCA<sub>low</sub></b>     | 13.7         | 24.8    | 10.5         | 21.9    | 22.1         | 18.1    | <b>21.6</b>     |
| <b>MOCA<sub>high</sub></b>    | 138.2        | 17.5    | 116          | 14.4    | 67.7         | 13.9    | <b>15.3</b>     |
| <b>2,4-TDA<sub>low</sub></b>  | 53.1         | 8.5     | 38.1         | 5.8     | 41.8         | 6.0     | <b>6.7</b>      |
| <b>2,4-TDA<sub>high</sub></b> | 195.6        | 5.0     | 135.7        | 4.7     | 70.2         | 5.4     | <b>5.0</b>      |
| <b>2,6-TDA<sub>low</sub></b>  | 52.3         | 6.7     | 46           | 3.7     | 47           | 6.4     | <b>5.6</b>      |
| <b>2,6-TDA<sub>high</sub></b> | 212.9        | 6.1     | 205          | 4.1     | 74.3         | 5.8     | <b>5.3</b>      |
| <b>MDA<sub>low</sub></b>      | 5.2          | 5.8     | 6.6          | 6.1     | 2.2          | 9.1     | <b>7.0</b>      |
| <b>MDA<sub>high</sub></b>     | 0.31         | 3.2     | 0.29         | 3.4     | 0.5          | 4.0     | <b>4.9</b>      |

CM = control material; RSD = relative standard deviation

**Supplementary material** to External quality assurance schemes (EQUASS) and interlaboratory comparison investigations (ICIs) for the human biomonitoring of aromatic amines in urine as part of the quality assurance programme under HBM4EU

**Suppl. Table 6** Obtained values of stability measurements (n = 3)

| Aromatic amine <sub>CM</sub>  | Round 1           |                   |                                                  | Round 2           |                   |                                                  | Round 3           |                   |                                                  | Over all rounds          |
|-------------------------------|-------------------|-------------------|--------------------------------------------------|-------------------|-------------------|--------------------------------------------------|-------------------|-------------------|--------------------------------------------------|--------------------------|
|                               | Mean ± SD (ng/mL) |                   | Relative difference between day 0 and day 46 (%) | Mean ± SD (ng/mL) |                   | Relative difference between day 0 and day 46 (%) | Mean ± SD (ng/mL) |                   | Relative difference between day 0 and day 46 (%) | Mean relative difference |
|                               | t = 0 d           | t = 46 d at -20°C |                                                  | t = 0 d           | t = 60 d at -20°C |                                                  | t = 0 d           | t = 40 d at -20°C |                                                  |                          |
| <b>TOL<sub>low</sub></b>      | 0.32 ± 0.01       | 0.30 ± 0.00       | 6.3                                              | 0.29 ± 0.01       | 0.30 ± 0.02       | 3.4                                              | 0.50 ± 0.02       | 0.46 ± 0.00       | 8.0                                              | 5.9                      |
| <b>TOL<sub>high</sub></b>     | 1.50 ± 0.04       | 1.39 ± 0.01       | 7.3                                              | 1.40 ± 0.05       | 1.45 ± 0.02       | 3.6                                              | 2.00 ± 0.02       | 1.83 ± 0.02       | 8.5                                              | 6.5                      |
| <b>Aniline<sub>low</sub></b>  | 2.8 ± 0.2         | 3.2 ± 0.2         | 14.3                                             | 1.6 ± 0.3         | 1.6 ± 0.1         | 0.0                                              | 4.6 ± 0.2         | 4.3 ± 0.3         | 6.5                                              | 6.9                      |
| <b>Aniline<sub>high</sub></b> | 11.5 ± 0.2        | 11.3 ± 0.2        | 1.7                                              | 10.1 ± 0.3        | 9.9 ± 0.1         | 2.0                                              | 18.8 ± 0.0        | 18.4 ± 0.5        | 2.1                                              | 1.9                      |
| <b>MOCA<sub>low</sub></b>     | 16.6 ± 2.2        | 13.9 ± 2.9        | 16.3                                             | 12.2 ± 4.6        | 7.6 ± 0.6         | 37.7                                             | 21.1 ± 0.7        | 17.5 ± 4.6        | 17.1                                             | 23.7                     |
| <b>MOCA<sub>high</sub></b>    | 145.7 ± 39.6      | 144.3 ± 18.8      | 1.0                                              | 107.1 ± 6.8       | 104.4 ± 17.2      | 2.5                                              | 63.0 ± 0.6        | 63.2 ± 13.6       | 0.3                                              | 1.3                      |
| <b>2,4-TDA<sub>low</sub></b>  | 52.5 ± 1.4        |                   |                                                  | 39.2 ± 2.5        | 42.2 ± 2.2        | 7.7                                              | 42.2 ± 2.7        | 41.7 ± 0.5        | 1.2                                              | 4.4                      |
| <b>2,4-TDA<sub>high</sub></b> | 186.7 ± 6.7       | 184.7 ± 9.7       | 1.1                                              | 141.7 ± 2.9       | 149.3 ± 6.4       | 5.4                                              | 71.2 ± 4.1        | 70.9 ± 2.9        | 0.4                                              | 2.3                      |
| <b>2,6-TDA<sub>low</sub></b>  | 54.8 ± 2.0        | 50.5 ± 3.4        | 7.8                                              | 45.2 ± 2.0        | 46.3 ± 5.4        | 2.4                                              | 44.2 ± 2.0        | 47.8 ± 3.8        | 8.1                                              | 6.1                      |
| <b>2,6-TDA<sub>high</sub></b> | 204.3 ± 10.0      | 203.0 ± 3.6       | 0.6                                              | 209.3 ± 10.0      | 225.7 ± 7.6       | 7.8                                              | 72.8 ± 5.2        | 75.9 ± 0.9        | 4.3                                              | 4.2                      |
| <b>MDA<sub>low</sub></b>      | 5.1 ± 0.6         | 5.8 ± 0.5         | 13.7                                             | 6.8 ± 0.5         | 6.9 ± 0.3         | 1.5                                              | 2.4 ± 0.3         | 2.5 ± 0.3         | 4.2                                              | 6.5                      |
| <b>MDA<sub>high</sub></b>     | 101.1 ± 6.8       | 95.0 ± 7.0        | 6.0                                              | 104.0 ± 6.1       | 113.7 ± 3.2       | 9.3                                              | 10.2 ± 0.3        | 11.0 ± 0.7        | 7.8                                              | 7.7                      |

SD = standard deviation

**Supplementary material** to External quality assurance schemes (EQUASs) and interlaboratory comparison investigations (ICIs) for the human biomonitoring of aromatic amines in urine as part of the quality assurance programme under HBM4EU

**Suppl. Table 7 Overview of evaluation scheme, evaluation results and Z-scores**

| Evaluation scheme |              |       |                           |               | Evaluation results |                                                       |           |                            |                            |                       | Z-scores  |           |           |
|-------------------|--------------|-------|---------------------------|---------------|--------------------|-------------------------------------------------------|-----------|----------------------------|----------------------------|-----------------------|-----------|-----------|-----------|
| Aromatic amine    | R            | CM    | Number of P (including E) | Evaluation as | A (ng/mL)          | Uncertainty of A or of C when A was not available (%) | C (ng/mL) | RSD <sub>experts</sub> (%) | Study RSD <sub>R</sub> (%) | $\frac{C - A}{A}$ (%) | Satis (%) | Quest (%) | Unsat (%) |
| TOL               | 1            | low   | 4 (3)                     | EQUAS         | 0.32               | 2.2                                                   | 0.30      | 8.4                        | 11.0                       | -6%                   | 4 (100%)  | 0 (0%)    | 0 (0%)    |
|                   |              | high  | 4 (3)                     | EQUAS         | 1.40               | 2.1                                                   | 1.32      | 8.1                        | 12.5                       | -6%                   | 4 (100%)  | 0 (0%)    | 0 (0%)    |
|                   | 2            | low   | 5 (3)                     | EQUAS         | 0.28               | 1.0                                                   | 0.29      | 3.7                        | 9.0                        | 4%                    | 5 (100%)  | 0 (0%)    | 0 (0%)    |
|                   |              | high  | 5 (3)                     | EQUAS         | 1.36               | 1.1                                                   | 1.33      | 4.3                        | 8.1                        | -2%                   | 5 (100%)  | 0 (0%)    | 0 (0%)    |
|                   | 3            | low   | 6 (3)                     | EQUAS         | 0.54               | 4.9                                                   | 0.55      | 18.3                       | 33.0                       | 2%                    | 5 (83.3%) | 0 (0%)    | 1 (16.7%) |
|                   |              | high  | 6 (3)                     | EQUAS         | 1.75               | 3.4                                                   | 1.61      | 12.7                       | 18.1                       | -8%                   | 5 (83.3%) | 1 (16.7%) | 0 (0%)    |
| TOL mean          | 1-3          | low   | 6 (3)                     | -             | -                  | 2.7                                                   | -         | 10.1                       | 17.7                       | -                     | 94.4%     | 0%        | 5.6%      |
|                   |              | high  | 6 (3)                     | -             | -                  | 2.2                                                   | -         | 8.4                        | 12.9                       | -                     | 94.4%     | 5.6%      | 0%        |
|                   | low and high | 6 (3) | -                         | -             | 2.5                | -                                                     | 9.25      | 15.3                       | -                          | 94.4%                 | 2.8%      | 2.8%      |           |
| Aniline           | 1            | low   | 4 (3)                     | np            | na                 | na                                                    | na        | na                         | na                         | na                    | na        | na        | na        |
|                   |              | high  | 4 (3)                     | np            | na                 | na                                                    | na        | na                         | na                         | na                    | na        | na        | na        |
|                   | 2            | low   | 5 (3)                     | np            | na                 | na                                                    | na        | na                         | na                         | na                    | na        | na        | na        |
|                   |              | high  | 5 (3)                     | np            | na                 | na                                                    | na        | na                         | na                         | na                    | na        | na        | na        |
|                   | 3            | low   | 5 (3)                     | np            | na                 | na                                                    | na        | na                         | na                         | na                    | na        | na        | na        |
| high              | 5(3)         | EQUAS | 15.5                      | 5.9           | 17.5               | 22.2                                                  | 22.5      | 13%                        | 5 (100%)                   | 0 (0%)                | 0 (0%)    |           |           |
| Aniline mean      | 1-3          | low   | 5 (3)                     | -             | -                  | -                                                     | -         | -                          | na                         | -                     | na        | na        | na        |
|                   |              | high  | 5 (3)                     | -             | -                  | -                                                     | -         | -                          | 22.5                       | -                     | 100%      | 0%        | 0%        |
|                   | low and high | 5 (3) | -                         | -             | -                  | -                                                     | -         | 22.5                       | -                          | 100%                  | 0%        | 0%        |           |

**Supplementary material** to External quality assurance schemes (EQUASs) and interlaboratory comparison investigations (ICIs) for the human biomonitoring of aromatic amines in urine as part of the quality assurance programme under HBM4EU

| Evaluation scheme |     |              |                           |               | Evaluation results |                                                       |           |                            |                            |                       | Z-scores  |           |           |
|-------------------|-----|--------------|---------------------------|---------------|--------------------|-------------------------------------------------------|-----------|----------------------------|----------------------------|-----------------------|-----------|-----------|-----------|
| Aromatic amine    | R   | CM           | Number of P (including E) | Evaluation as | A (ng/mL)          | Uncertainty of A or of C when A was not available (%) | C (ng/mL) | RSD <sub>experts</sub> (%) | Study RSD <sub>R</sub> (%) | $\frac{C - A}{A}$ (%) | Satis (%) | Quest (%) | Unsat (%) |
| MOCA              | 1   | low          | 8 (4)                     | ICI           | na                 | 6.0                                                   | 8.5       | –                          | 59.0                       | na                    | 6 (75%)   | 1 (12.5%) | 1 (12.5%) |
|                   |     | high         | 8 (4)                     | EQUAS         | 107.6              | 6.0                                                   | 72.9      | 21.8                       | 42.7                       | –32%                  | 5 (62.5%) | 2 (25%)   | 1 (12.5%) |
|                   | 2   | low          | 8 (3)                     | ICI           | na                 | 14.8                                                  | 13.3      | –                          | 39.3                       | na                    | 7 (87.5%) | 1 (12.5%) | 0 (0%)    |
|                   |     | high         | 8 (3)                     | EQUAS         | 127.2              | 3.6                                                   | 130.1     | 13.7                       | 16.1                       | 2%                    | 8 (100%)  | 0 (0%)    | 0 (0%)    |
|                   | 3   | low          | 9 (5)                     | EQUAS         | 9.3                | 3.8                                                   | 9.6       | 14.8                       | 59.0                       | 3%                    | 8 (89%)   | 0 (0%)    | 1 (11%)   |
|                   |     | high         | 9 (5)                     | EQUAS         | 42.7               | 6.5                                                   | 40.6      | 25.4                       | 44.5                       | –5%                   | 8 (89%)   | 0 (0%)    | 1 (11%)   |
| MOCA mean         | 1–3 | low          | 9 (5)                     | –             | –                  | 8.2                                                   | –         | –                          | 52.4                       | –                     | 83.8%     | 8.3%      | 7.8%      |
|                   |     | high         | 9 (5)                     | –             | –                  | 5.4                                                   | –         | 20.3                       | 34.4                       | –                     | 83.8%     | 8.3%      | 7.8%      |
|                   |     | low and high | 9 (5)                     | –             | –                  | 6.8                                                   | –         | –                          | 43.4                       | –                     | 83.8%     | 8.3%      | 7.8%      |
| 2,4-TDA           | 1   | low          | 7 (4)                     | EQUAS         | 49.1               | 1.3                                                   | 47.1      | 4.9                        | 34.0                       | –4%                   | 5 (72%)   | 1 (14%)   | 1 (14%)   |
|                   |     | high         | 7 (4)                     | EQUAS         | 178.3              | 2.8                                                   | 147.1     | 10.4                       | 34.2                       | –17%                  | 5 (72%)   | 1 (14%)   | 1 (14%)   |
|                   | 2   | low          | 8 (3)                     | ICI           | na                 | 9.2                                                   | 40.7      | –                          | 22.2                       | na                    | 7 (87.5%) | 0 (0%)    | 1 (12.5%) |
|                   |     | high         | 8 (3)                     | ICI           | na                 | 8.2                                                   | 138.7     | –                          | 17.4                       | na                    | 7 (87.5%) | 0 (0%)    | 1 (12.5%) |
|                   | 3   | low          | 8 (5)                     | EQUAS         | 41.5               | 1.5                                                   | 39.6      | 7.1                        | 10.0                       | na                    | 8 (100%)  | 0 (0%)    | 0 (0%)    |
|                   |     | high         | 8 (5)                     | EQUAS         | 69.6               | 1.1                                                   | 66.0      | 5.3                        | 9.7                        | –5%                   | 8 (100%)  | 0 (0%)    | 0 (0%)    |
| 2,4-TDA mean      | 1–3 | low          | 8 (5)                     | –             | –                  | 4.0                                                   | –         | –                          | 22.1                       | –                     | 86.5%     | 4.7%      | 8.8%      |
|                   |     | high         | 8 (5)                     | –             | –                  | 4.0                                                   | –         | –                          | 20.4                       | –                     | 86.5%     | 4.7%      | 8.8%      |
|                   |     | low and high | 8 (5)                     | –             | –                  | 4.0                                                   | –         | –                          | 21.3                       | –                     | 86.5%     | 4.7%      | 8.8%      |



**Supplementary material** to External quality assurance schemes (EQUASs) and interlaboratory comparison investigations (ICIs) for the human biomonitoring of aromatic amines in urine as part of the quality assurance programme under HBM4EU

| Evaluation scheme |     |              |                           |               | Evaluation results |                                                       |           |                            |                            |                       | Z-scores  |           |           |
|-------------------|-----|--------------|---------------------------|---------------|--------------------|-------------------------------------------------------|-----------|----------------------------|----------------------------|-----------------------|-----------|-----------|-----------|
| Aromatic amine    | R   | CM           | Number of P (including E) | Evaluation as | A (ng/mL)          | Uncertainty of A or of C when A was not available (%) | C (ng/mL) | RSD <sub>experts</sub> (%) | Study RSD <sub>R</sub> (%) | $\frac{C - A}{A}$ (%) | Satis (%) | Quest (%) | Unsat (%) |
| 2,6-TDA           | 1   | low          | 7 (4)                     | EQUAS         | 51.8               | 3.2                                                   | 46.4      | 12.1                       | 37.0                       | -10%                  | 5 (71%)   | 0 (0%)    | 2 (29%)   |
|                   |     | high         | 7 (4)                     | ICI*          | na                 | 5.4                                                   | 196.2     | -                          | 40.1                       | na                    | 5 (72%)   | 1 (14%)   | 1 (14%)   |
|                   | 2   | low          | 8 (3)                     | ICI           | na                 | 2.3                                                   | 45.5      | -                          | 25.1                       | na                    | 6 (75%)   | 1 (12.5%) | 1 (12.5%) |
|                   |     | high         | 8 (3)                     | ICI           | na                 | 12.3                                                  | 192.9     | -                          | 25.1                       | na                    | 7 (87.5%) | 0 (0%)    | 1 (12.5%) |
|                   | 3   | low          | 8 (5)                     | EQUAS         | 48.5               | 2.7                                                   | 49.1      | 12.6                       | 122.0                      | 1%                    | 7 (87.5%) | 0 (0%)    | 1 (12.5%) |
|                   |     | high         | 8 (5)                     | EQUAS         | 77.4               | 3.0                                                   | 78.8      | 13.8                       | 70.2                       | 2%                    | 7 (87.5%) | 0 (0%)    | 1 (12.5%) |
| 2,6-TDA mean      | 1-3 | low          | 8 (5)                     | -             | -                  | 2.7                                                   | -         | -                          | 61.4                       | -                     | 77.8%     | 4.2%      | 18.0%     |
|                   |     | high         | 8 (5)                     | -             | -                  | 6.9                                                   | -         | -                          | 45.1                       | -                     | 82.3%     | 4.7%      | 13.0%     |
|                   |     | low and high | 8 (5)                     | -             | -                  | 4.8                                                   | -         | -                          | 53.3                       | -                     | 80.1%     | 4.4%      | 15.5%     |
| MDA               | 1   | low          | 8 (4)                     | EQUAS         | 4.9                | 2.9                                                   | 4.5       | 12.2                       | 18.0                       | -8%                   | 8 (100%)  | 0 (0%)    | 0 (0%)    |
|                   |     | high         | 8 (4)                     | EQUAS*        | 95.2               | 1.7                                                   | 80.7      | 6.3                        | 24.8                       | -15%                  | 7 (87.5%) | 1 (12.5%) | 0 (0%)    |
|                   | 2   | low          | 9 (3)                     | ICI           | na                 | 9.5                                                   | 5.6       | -                          | 20.1                       | na                    | 8 (89%)   | 0 (0%)    | 1 (11%)   |
|                   |     | high         | 9 (3)                     | ICI           | na                 | 7.1                                                   | 91.7      | -                          | 12.4                       | na                    | 8 (89%)   | 0 (0%)    | 1 (11%)   |
|                   | 3   | low          | 10 (5)                    | EQUAS         | 2.2                | 2.0                                                   | 2.2       | 9.1                        | 12.0                       | 0%                    | 10 (100%) | 0 (0%)    | 0 (0%)    |
| high              |     | 10 (5)       | EQUAS                     | 10.3          | 2.3                | 9.3                                                   | 10.9      | 12.5                       | -10%                       | 10 (100%)             | 0 (0%)    | 0 (0%)    |           |
| MDA mean          | 1-3 | low          | 10 (5)                    | -             | -                  | 4.8                                                   | -         | -                          | 16.7                       | -                     | 96.3%     | 0%        | 3.7%      |
|                   |     | high         | 10 (5)                    | -             | -                  | 3.7                                                   | -         | -                          | 16.6                       | -                     | 92.2%     | 4.2%      | 3.7%      |
|                   |     | low and high | 10 (5)                    | -             | -                  | 4.3                                                   | -         | -                          | 16.6                       | -                     | 94.3%     | 2.1%      | 3.7%      |

**Supplementary material** to External quality assurance schemes (EQUASs) and interlaboratory comparison investigations (ICIs) for the human biomonitoring of aromatic amines in urine as part of the quality assurance programme under HBM4EU

| Evaluation scheme           |     |              |                           |               | Evaluation results |                                                       |           |                            |                            |                       | Z-scores  |           |           |
|-----------------------------|-----|--------------|---------------------------|---------------|--------------------|-------------------------------------------------------|-----------|----------------------------|----------------------------|-----------------------|-----------|-----------|-----------|
| Aromatic amine              | R   | CM           | Number of P (including E) | Evaluation as | A (ng/mL)          | Uncertainty of A or of C when A was not available (%) | C (ng/mL) | RSD <sub>experts</sub> (%) | Study RSD <sub>R</sub> (%) | $\frac{C - A}{A}$ (%) | Satis (%) | Quest (%) | Unsat (%) |
| <b>Aromatic amines mean</b> | 1-3 | low and high | –                         | –             | –                  | –                                                     | –         | –                          | –                          | –                     | 89.9%     | 3.7%      | 6.4%      |

A = assigned value; C = consensus value; CM = control material; E = experts; na = not available; np = no evaluation was possible because EQUAS requirements did not meet the criterion ( $u > 0.7 \sigma_T$ ) and the number of participants was too low to calculate a reliable ICI consensus value; EQUAS\* = EQUAS evaluation with results from only 2 experts; ICI\* = ICI evaluation with results from only 5 participants; P = participants; Quest = questionable; R = round; RSD<sub>experts</sub> = relative standard deviation of experts' results; Satis = satisfactory; Study RSD<sub>R</sub> = robust relative standard deviation of participants' results; Unsat = unsatisfactory;

**Suppl. Table 8 Range of LOQs reported by participants and experts for aromatic amines**

| <b>TOL</b> | <b>Participants</b>           | <b>Round 1</b> | <b>Round 2</b> | <b>Round 3</b> | <b>Over all rounds</b> |
|------------|-------------------------------|----------------|----------------|----------------|------------------------|
|            | lowest LOQ (ng/mL)            | 0.010          | 0.010          | 0.010          | <b>0.010</b>           |
|            | highest LOQ (ng/mL)           | 0.600          | 0.200          | 1.000          | <b>1.000</b>           |
|            | mean LOQ (ng/mL)              | 0.162          | 0.102          | 0.260          | <b>0.175</b>           |
|            | total number of reported LOQs | 5              | 6              | 6              | <b>17</b>              |
|            | <b>Experts</b>                | <b>Round 1</b> | <b>Round 2</b> | <b>Round 3</b> | <b>Over all rounds</b> |
|            | lowest LOQ (ng/mL)            | 0.010          | 0.010          | 0.010          | <b>0.010</b>           |
|            | highest LOQ (ng/mL)           | 0.100          | 0.100          | 0.100          | <b>0.100</b>           |
|            | mean LOQ (ng/mL)              | 0.053          | 0.053          | 0.053          | <b>0.053</b>           |
|            | total number of reported LOQs | 3              | 3              | 3              | <b>9</b>               |

| <b>Aniline</b> | <b>Participants</b>           | <b>Round 1</b> | <b>Round 2</b> | <b>Round 3</b> | <b>Over all rounds</b> |
|----------------|-------------------------------|----------------|----------------|----------------|------------------------|
|                | lowest LOQ (ng/mL)            | 0.100          | 0.100          | 0.100          | <b>0.100</b>           |
|                | highest LOQ (ng/mL)           | 2.00           | 2.00           | 2.00           | <b>2.00</b>            |
|                | mean LOQ (ng/mL)              | 0.960          | 0.967          | 1.26           | <b>1.06</b>            |
|                | total number of reported LOQs | 5              | 6              | 5              | <b>16</b>              |
|                | <b>Experts</b>                | <b>Round 1</b> | <b>Round 2</b> | <b>Round 3</b> | <b>Over all rounds</b> |
|                | lowest LOQ (ng/mL)            | 0.100          | 0.100          | 0.100          | <b>0.100</b>           |
|                | highest LOQ (ng/mL)           | 2.00           | 2.00           | 2.00           | <b>2.00</b>            |
|                | mean LOQ (ng/mL)              | 0.767          | 0.767          | 0.767          | <b>0.767</b>           |
|                | total number of reported LOQs | 3              | 3              | 3              | <b>9</b>               |

| <b>MOCA</b> | <b>Participants</b>           | <b>Round 1</b> | <b>Round 2</b> | <b>Round 3</b> | <b>Over all rounds</b> |
|-------------|-------------------------------|----------------|----------------|----------------|------------------------|
|             | lowest LOQ (ng/mL)            | 0.050          | 0.050          | 0.050          | <b>0.050</b>           |
|             | highest LOQ (ng/mL)           | 10.0           | 10.0           | 2.00           | <b>10.0</b>            |
|             | mean LOQ (ng/mL)              | 2.35           | 1.78           | 1.02           | <b>1.72</b>            |
|             | total number of reported LOQs | 8              | 8              | 8              | <b>24</b>              |
|             | <b>Experts</b>                | <b>Round 1</b> | <b>Round 2</b> | <b>Round 3</b> | <b>Over all rounds</b> |
|             | lowest LOQ (ng/mL)            | 0.050          | 0.050          | 0.050          | <b>0.050</b>           |
|             | highest LOQ (ng/mL)           | 10.0           | 10.0           | 10.0           | <b>10.0</b>            |
|             | mean LOQ (ng/mL)              | 2.38           | 2.37           | 2.38           | <b>2.38</b>            |
|             | total number of reported LOQs | 5              | 5              | 5              | <b>15</b>              |

| <b>2,4-TDA</b> | <b>Participants</b>           | <b>Round 1</b> | <b>Round 2</b> | <b>Round 3</b> | <b>Over all rounds</b> |
|----------------|-------------------------------|----------------|----------------|----------------|------------------------|
|                | lowest LOQ (ng/mL)            | 0.050          | 0.050          | 0.050          | <b>0.050</b>           |
|                | highest LOQ (ng/mL)           | 25.0           | 25.0           | 25.0           | <b>25.0</b>            |
|                | mean LOQ (ng/mL)              | 4.02           | 3.64           | 3.77           | <b>3.80</b>            |
|                | total number of reported LOQs | 7              | 8              | 8              | <b>23</b>              |
|                | <b>Experts</b>                | <b>Round 1</b> | <b>Round 2</b> | <b>Round 3</b> | <b>Over all rounds</b> |
|                | lowest LOQ (ng/mL)            | 0.050          | 0.050          | 0.050          | <b>0.050</b>           |
|                | highest LOQ (ng/mL)           | 25.0           | 25.0           | 25.0           | <b>25.0</b>            |
|                | mean LOQ (ng/mL)              | 5.23           | 5.23           | 5.23           | <b>5.23</b>            |
|                | total number of reported LOQs | 5              | 5              | 5              | <b>15</b>              |

**Suppl. Table 8 Range of LOQs reported by participants and experts for aromatic amines (continued)**

|                               |                               |                |                |                |                        |
|-------------------------------|-------------------------------|----------------|----------------|----------------|------------------------|
| <b>2,6-TDA</b>                | <b>Participants</b>           | <b>Round 1</b> | <b>Round 2</b> | <b>Round 3</b> | <b>Over all rounds</b> |
|                               | lowest LOQ (ng/mL)            | 0.050          | 0.050          | 0.050          | <b>0.050</b>           |
|                               | highest LOQ (ng/mL)           | 25.0           | 25.0           | 25.0           | <b>25.0</b>            |
|                               | mean LOQ (ng/mL)              | 4.02           | 3.64           | 3.77           | <b>3.80</b>            |
|                               | total number of reported LOQs | 7              | 8              | 8              | <b>23</b>              |
|                               | <b>Experts</b>                | <b>Round 1</b> | <b>Round 2</b> | <b>Round 3</b> | <b>Over all rounds</b> |
|                               | lowest LOQ (ng/mL)            | 0.050          | 0.050          | 0.050          | <b>0.050</b>           |
|                               | highest LOQ (ng/mL)           | 25.0           | 25.0           | 25.0           | <b>25.0</b>            |
|                               | mean LOQ (ng/mL)              | 5.23           | 5.23           | 5.23           | <b>5.23</b>            |
| total number of reported LOQs | 5                             | 5              | 5              | <b>15</b>      |                        |

|                               |                               |                |                |                |                        |
|-------------------------------|-------------------------------|----------------|----------------|----------------|------------------------|
| <b>MDA</b>                    | <b>Participants</b>           | <b>Round 1</b> | <b>Round 2</b> | <b>Round 3</b> | <b>Over all rounds</b> |
|                               | lowest LOQ (ng/mL)            | 0.030          | 0.030          | 0.030          | <b>0.030</b>           |
|                               | highest LOQ (ng/mL)           | 1.00           | 1.00           | 1.00           | <b>1.00</b>            |
|                               | mean LOQ (ng/mL)              | 0.496          | 0.353          | 0.507          | <b>0.453</b>           |
|                               | total number of reported LOQs | 8              | 9              | 10             | <b>27</b>              |
|                               | <b>Experts</b>                | <b>Round 1</b> | <b>Round 2</b> | <b>Round 3</b> | <b>Over all rounds</b> |
|                               | lowest LOQ (ng/mL)            | 0.030          | 0.030          | 0.030          | <b>0.030</b>           |
|                               | highest LOQ (ng/mL)           | 1.00           | 1.00           | 1.00           | <b>1.00</b>            |
|                               | mean LOQ (ng/mL)              | 0.474          | 0.296          | 0.294          | <b>0.355</b>           |
| total number of reported LOQs | 5                             | 5              | 5              | <b>15</b>      |                        |

## Supplementary Figures

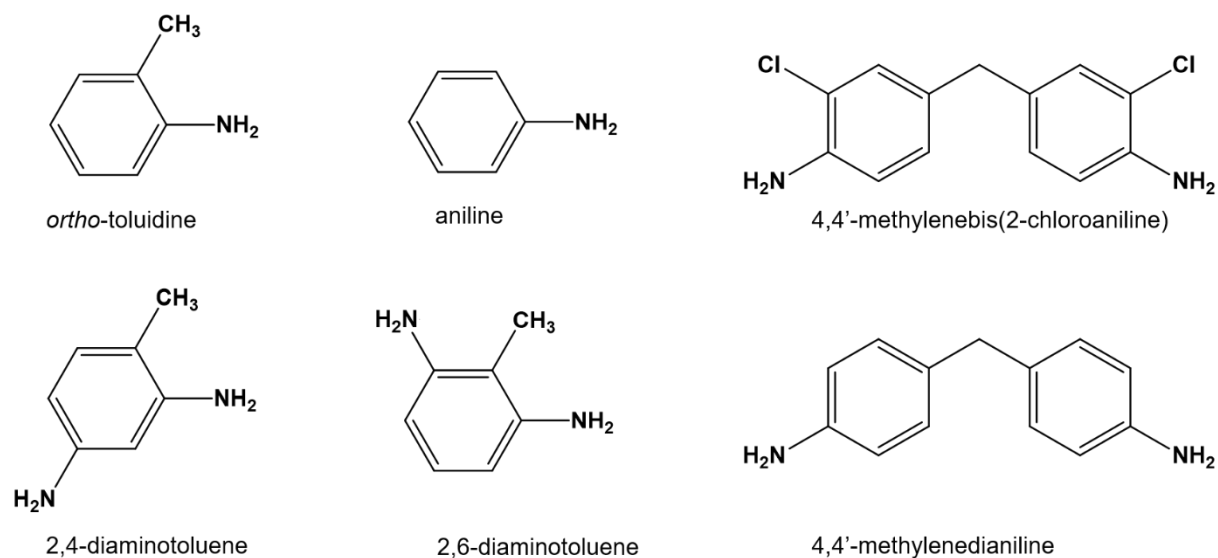

Suppl. Fig. 1 Structures of the analysed aromatic amines in the HBM4EU QA/QC programme

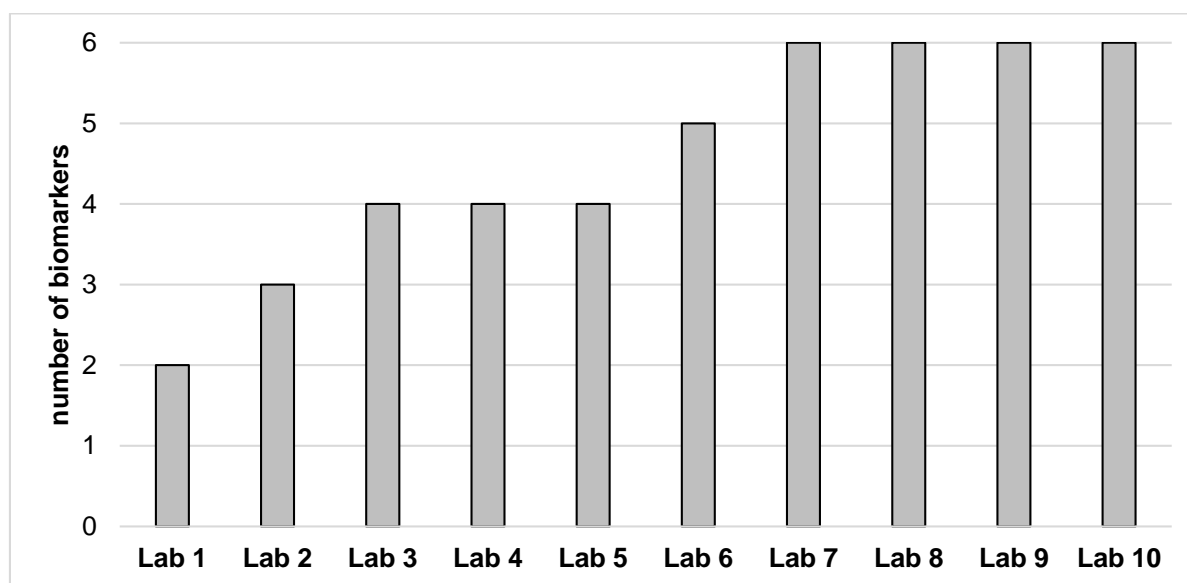

Suppl. Fig. 2 Number of biomarkers for which quantitative results were reported

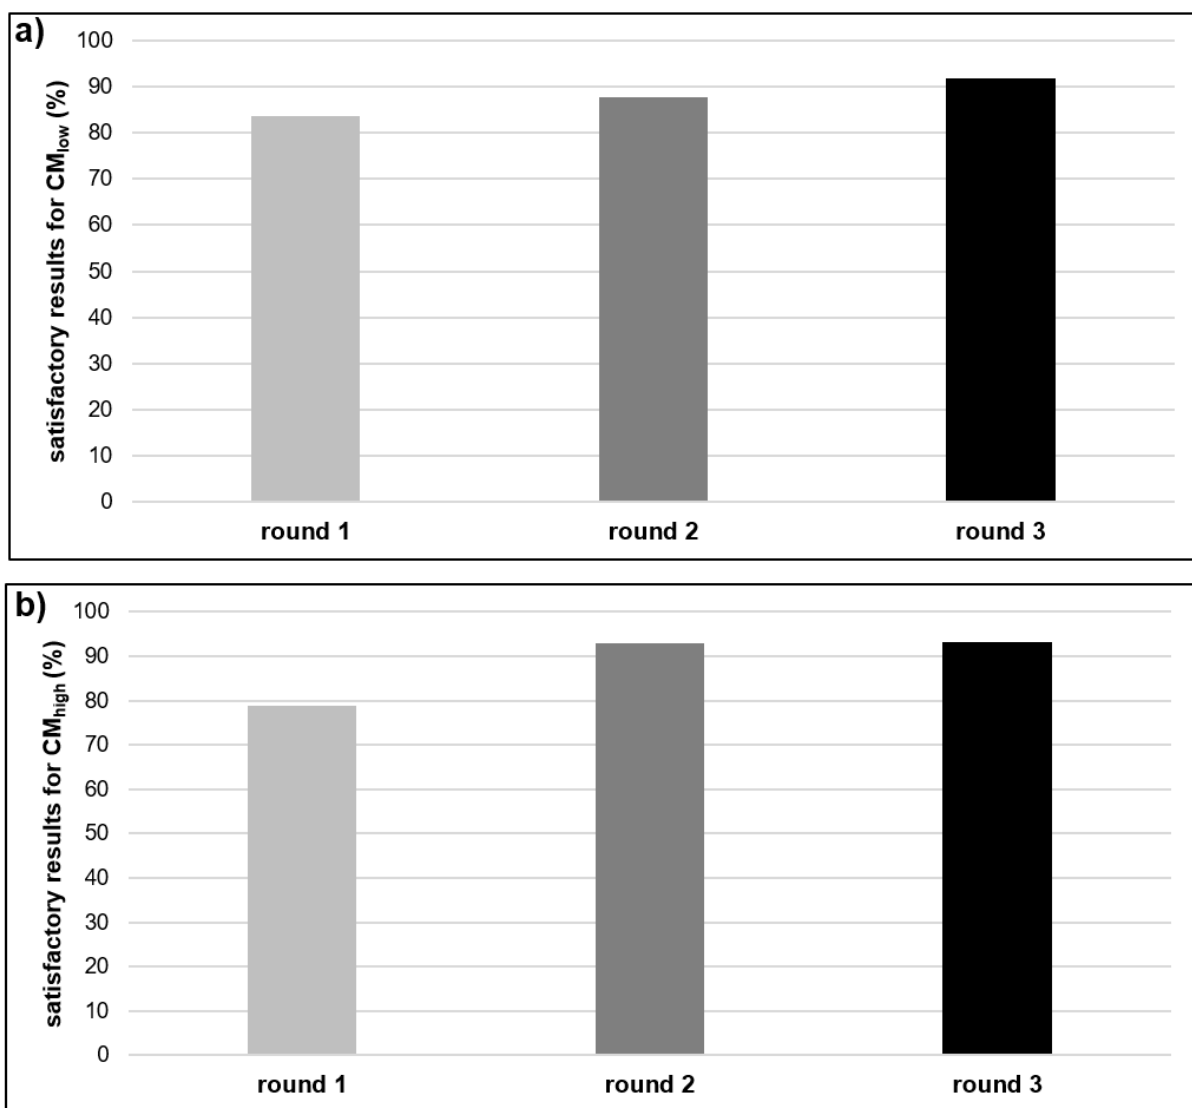

Suppl. Fig. 3 Average of satisfactory results for the evaluable biomarkers in  $CM_{low}$  (a) and  $CM_{high}$  (b)

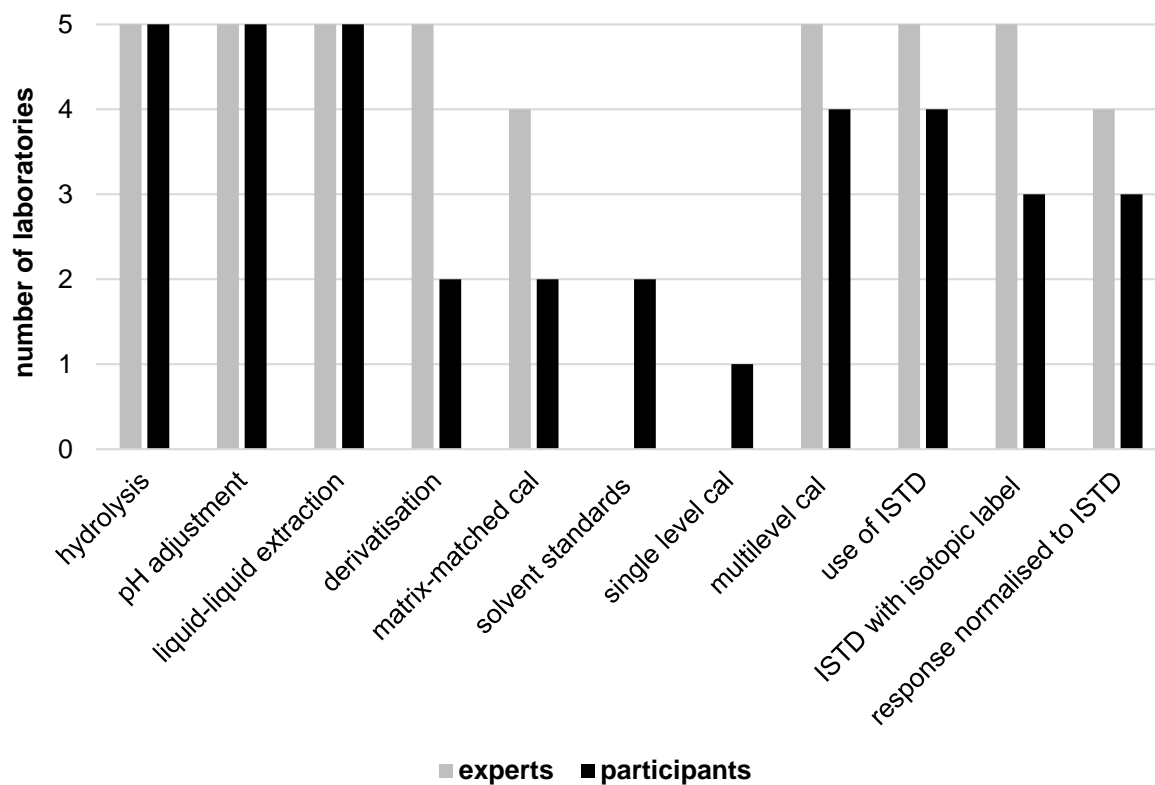

Suppl. Fig. 4 Method features of experts (n = 5) and participants (n = 5)  
cal = calibration, ISTD = internal standard

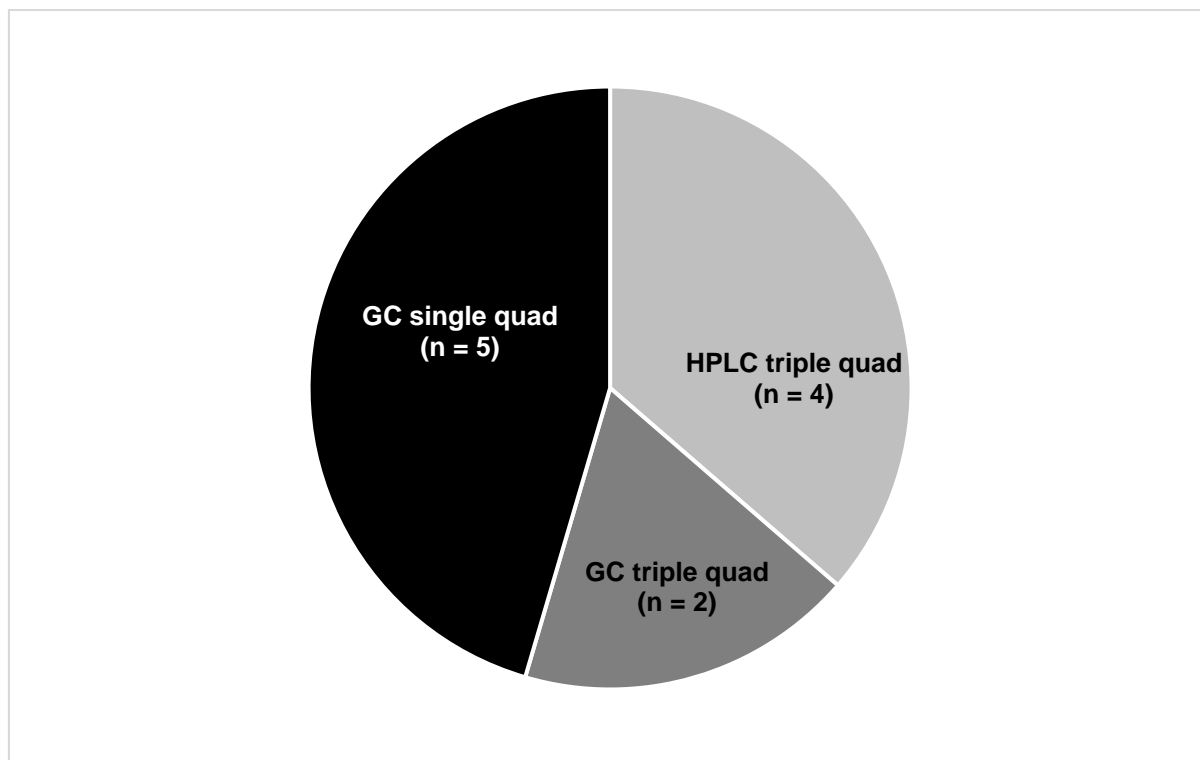

Suppl. Fig. 5 Applied instruments and detection techniques by participants (including experts)
